# Supplementary material
Source: PubMed Central journal article supplement (PMC7739268)
Supplement: NIHMS1648086-supplement-Supplementary_Material.pdf [file NIHMS1648086-supplement-Supplementary_Material.pdf]

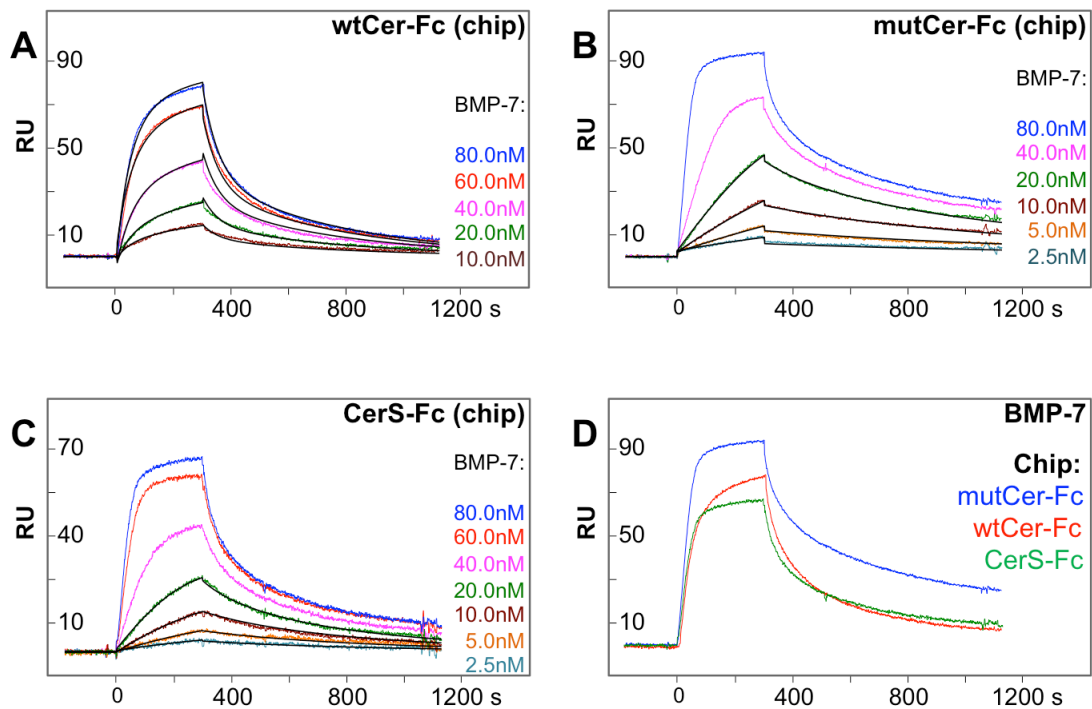

**Supplemental Figure S1: Cerberus ligand binding affinities.** (A) BMP-7-wtCer-Fc binding. wtCer-Fc was immobilized on the SPR sensor chip and different concentrations of BMP-7 were injected as shown. (B) BMP-7-mutCer-Fc binding. mutCer-Fc was immobilized and BMP-7 was injected as shown. (C) BMP-7-CerS-Fc binding. CerS-Fc was immobilized and BMP-7 was injected. Overall, the binding rate constant for BMP-7 is faster than BMP-6, but slower than Activin B. The dissociation rate constant is faster. Data fitting was more problematic for BMP-7, likely due to fast association and fast dissociation rates. Therefore only lower concentrations of BMP-7 were used in evaluation. Fitted curves are superimposed and shown as black lines. (D) Comparison of BMP-7 binding to wtCer-Fc, mutCer-Fc, CerS-Fc. Equal amounts of wtCer-Fc, mutCer-Fc and CerS-Fc were immobilized on the SPR sensor chip, and 80 nM BMP-7 were injected. wtCer-Fc (red curves), mutCer-Fc (blue curves) and CerS-Fc (green curves) show similar binding profiles, the binding rate of mutCer-Fc is faster.

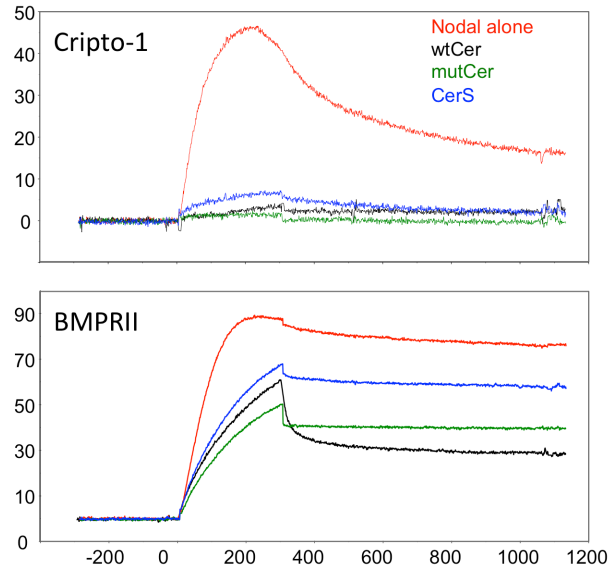

**Supplemental Figure S2: Cerberus inhibition of Nodal.** **(A)** Cerberus inhibition of Nodal-Cripto-1 binding. **(B)** Cerberus inhibition of Nodal-BMPRII binding. BMPRII-Fc, or Cripto-1-Fc were immobilized on a sensor chip and 80 nM Nodal pre-incubated with 4  $\mu$ M Fc free Cerberus (Nodal alone, red; Nodal + wtCer, black; Nodal + mutCer, green; Nodal + CerS, blue) was injected.

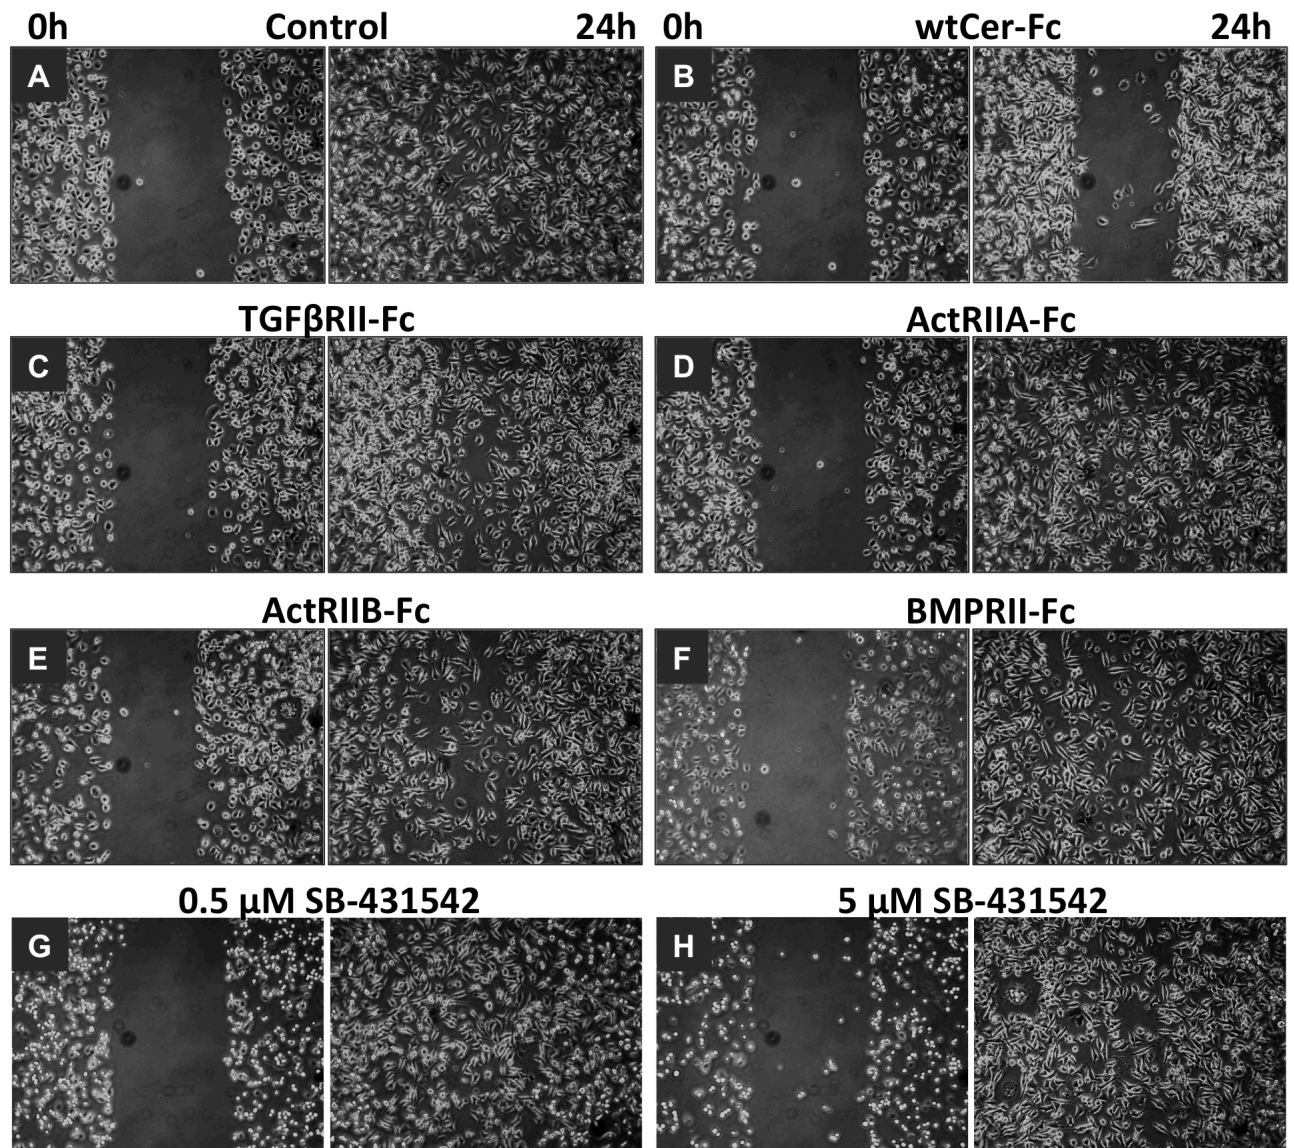

**Supplemental Figure S3: Inhibition of MDA-MB-231 breast cancer cell migration.** MDA-MB-231 breast cancer cells were plated in Ibbidi insert dishes and grown to 80% confluence. Inserts were removed to create a gap and medium was exchanged with complete medium containing 2.5  $\mu\text{g/ml}$  Mitomycin C and (A) 0 mg/ml (control) or 10 mg/ml (approximately 15 nM) (B) wtCer-Fc, (C) TGF $\beta$ RII-Fc, (D) ActRIIA-Fc, (E) ActRIIB-Fc, (F) BMPRII-Fc, (G) 0.5  $\mu\text{M}$  SB-431542, and (H) 5  $\mu\text{M}$  SB-431542. Images were taken after insert removal (0 h) and after 24 h incubation with inhibitors (24 h).

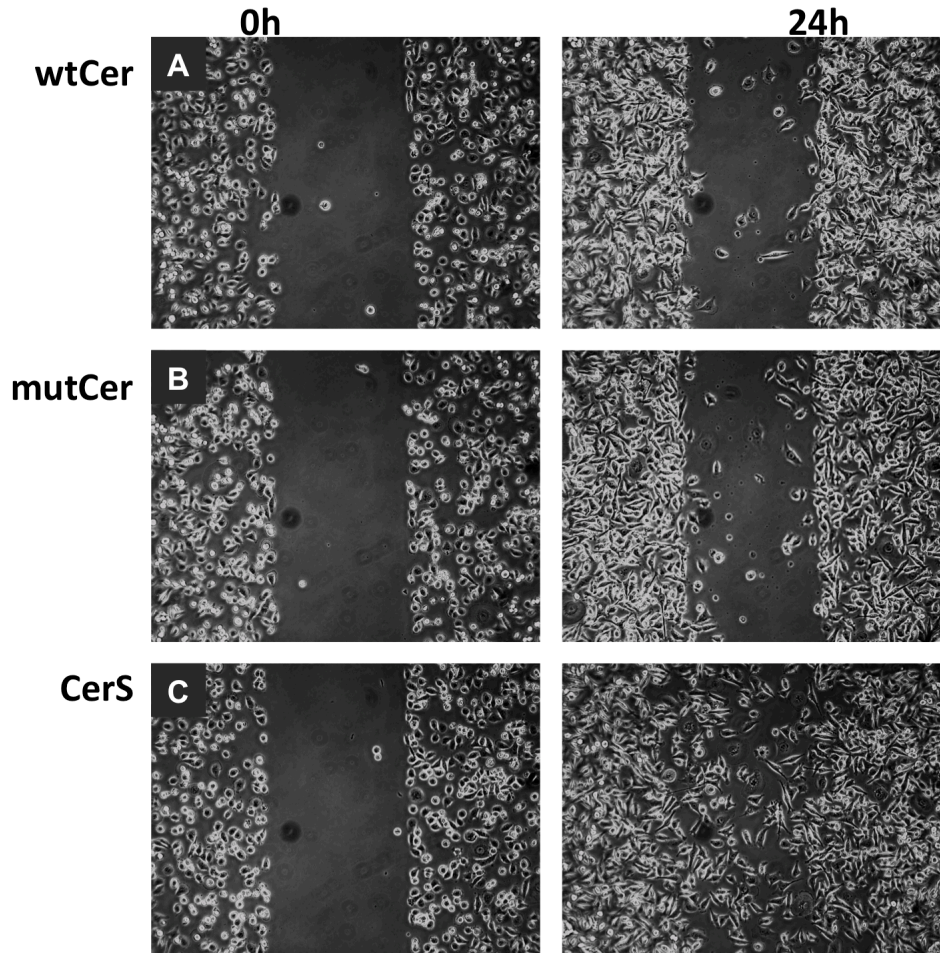

**Supplemental Figure S4: Inhibition of MDA-MB-231 breast cancer cell migration with Fc free Cerberus.** MDA-MB-231 breast cancer cells were plated in Ibidi insert dishes and grown to 80% confluence. Inserts were removed to create a gap and medium was exchanged with complete medium containing 2.5  $\mu\text{g/ml}$  Mitomycin C and **(A)** wtCer, **(B)** mutCer, **(C)** CerS. Images were taken after insert removal (0 h) and after 24 h incubation with Fc-free Cerberus constructs (24 h).

### Rate equations used in biaevaluation for fitting of mass transport limited models

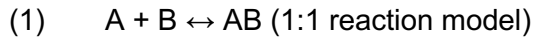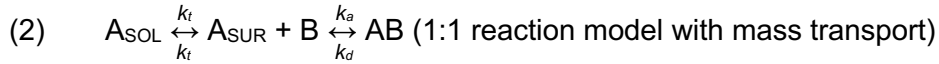

(3)  $dA/dt = k_t(A_{\text{SOL}} - A_{\text{SUR}}) - (k_a A_{\text{SUR}} B - k_d AB)$   
 $A[t_0] = 0$  (M)

$$dB/dt = - (k_a A_{\text{SUR}} B - k_d AB)$$
$$B[t_0] = R_{\text{max}} \text{ (Maximum analyte binding capacity)}$$

$$dAB/dt = (k_a A_{\text{SUR}} B - k_d AB)$$
$$AB[t_0] = 0 \text{ (M)}$$

$A_{\text{SOL}}$  = Bulk concentration analyte (A) in solution (M)

$A_{\text{SUR}}$  = Concentration of analyte (A) near the surface (M)

$k_a$  = Association rate constant ( $\text{M}^{-1}\text{s}^{-1}$ )

$k_d$  = Dissociation rate constant ( $\text{s}^{-1}$ )

$k_t$  = Rate constant for mass transfer ( $\text{RU M}^{-1}\text{s}^{-1}$ )

$k_m$  = Mass transport coefficient ( $\text{s}^{-1}$ )

RI = Bulk refractive index contribution (RU)

(4)  $k_t = k_m * MW * 10^{-9}$

A 1:1 Langmuir interaction model (eq. 1) with a simplified expression for mass transfer limitation (eqs. 2, 3) as implemented in biaevaluation software was used. This model introduces an expression for  $dA/dt$ , the rate of change in concentration of analyte A, where  $A_{\text{SUR}}$  represents the concentration of analyte near the surface that can bind ligand (Cerberus) and  $A_{\text{SOL}}$  represents the bulk concentration of analyte in solution (Activin B, BMP-7, BMP-6 or Nodal). The model produces a mass transfer rate constant  $k_t$ , which is related to the mass transport coefficient  $k_m$  (eq. 4).
